# Supplementary material for: Genetic variation in ALDH4A1 is associated with muscle health over the lifespan and across species
Source: eLife. 2022 Apr 26;11:e74308. doi: 10.7554/eLife.74308 (PMC9106327; doi:10.7554/eLife.74308)
Supplement: Figure 1—source data 1. — The impact of each missense mutation as predicted by Phyre and Missense3D (Kelley et al., 2015; Ittisoponpisan et al., 2019) and the corresponding phenotypic observations made in C. elegans. [file elife-74308-fig1-data1.xlsx]

## Sheet: ALH-6 Mutant Table
	Mutant(s)	Amino Acid Position	Amino Acid Change		ALH-6 Protein Structure Changes										Phenotypes Affected
					No Structural Damage	Buried Charge Introduced	Buried Charge Replaced	Buried Glycine Replaced	Buried Salt Bridge Breakage	Buried or Exposed Switch	Glycine in a Bend	Buried H-Bond Breakage	Cavity Altered	Disallowed Phi/Psi	GFP Expression	L4 Center Point Speed	Day 3 Adult Center Point Speed	L4 Thrashing	Day 3 Adult Thrashing
	lax927,937,940	152	G>R			X		X							X	X	X	X	X
	lax924	153	K>T				X		X						X	X	X	X
	lax921	199	G>E			X		X							X		X	X
	lax902	201	E>K		X										X		X		X
	lax904,911	202	G>R					X		X	X				X		X
	lax909,935	209	P>L		X										X		X	X	X
	lax900	214	A>T		X										X		X
	lax907	230	S>F									X			X
	lax993	270	G>D		X										X		X
	lax922	309	P>L		X										X		X
	lax938	339	S>F									X			X		X
	lax908	345	G>E		X										X		X	X
	lax905	345	G>R										X		X		X	X	X
	lax923,925	418	G>S		X										X		X	X	X
	lax941	419	G>E		X										X		X		X
	lax916,920,929,934	447	E>K		X										X		X		X
	lax105,901,992	521	G>E											X	X		X
	lax910,928	523	S>F		X										X	X	X		X
	lax914,932,933,947	527	G>R		X										X	X	X		X
